# Supplementary material for: Barriers to and Facilitators of Technology in Cardiac Rehabilitation and Self-Management: Systematic Qualitative Grounded Theory Review
Source: PubMed Central journal article supplement (PMC7688378; doi:10.2196/18025), 2020-11-11
Supplement: jmir_v22i11e18025_app2.pdf [file jmir_v22i11e18025_app2.pdf]

## Multimedia Appendix 1: Search strategy

|          |                                                                                                                                                                                                                                                                                                                                                                                                                                                                                                                                                                                                                                                                                                                                                                                                                                                                                                                                                                                                                                                                                                 |      |
|----------|-------------------------------------------------------------------------------------------------------------------------------------------------------------------------------------------------------------------------------------------------------------------------------------------------------------------------------------------------------------------------------------------------------------------------------------------------------------------------------------------------------------------------------------------------------------------------------------------------------------------------------------------------------------------------------------------------------------------------------------------------------------------------------------------------------------------------------------------------------------------------------------------------------------------------------------------------------------------------------------------------------------------------------------------------------------------------------------------------|------|
| ACM      | <p>recordAbstract:(mobile OR wearable OR mhealth OR sensing OR tele* OR smartphone) AND recordAbstract:(cardiac OR coronary OR cardiovascular OR "heart failure" OR "heart disease") AND recordAbstract:(behavio*r OR "health*care" OR prevention OR detection OR rehabilitation OR persuasion OR persuasive OR informatics OR tracking OR monitoring OR quantified OR habit) OR acmdlTitle:(mobile OR wearable OR mhealth OR sensors OR "tele-monitoring" OR telehealth OR smartphone OR coronary OR "heart failure" OR "heart disease" OR cardiovascular OR behavio*r OR persuasive OR persuasion OR informatics OR tracking OR quantified OR prevention OR rehabilitation OR monitoring OR habit OR detection) OR keywords.author.keyword:(mobile OR wearable OR mhealth OR sensors OR "tele-monitoring" OR telehealth OR smartphone OR coronary OR "heart failure" OR "heart disease" OR cardiovascular OR behavio*r OR persuasive OR persuasion OR informatics OR tracking OR quantified OR prevention OR rehabilitation OR monitoring OR habit OR detection)</p>                          | 88   |
| Scopus   | <p>ABS ( mobile OR wearable OR mhealth OR sensors OR "tele-monitoring" OR telehealth OR smartphone ) AND ABS ( coronary OR "heart failure" OR "heart disease" OR cardiovascular ) AND ABS ( behavio*r OR persuasive OR persuasion OR informatics OR tracking OR quantified OR prevention OR rehabilitation OR monitoring OR habit OR detection ) OR AUTHKEY( (mobile OR wearable OR mhealth OR sensors OR "tele-monitoring" OR telehealth OR smartphone) AND (coronary OR "heart failure" OR "heart disease" OR cardiovascular) AND (behavio*r OR persuasive OR persuasion OR informatics OR tracking OR quantified OR prevention OR rehabilitation OR monitoring OR habit OR detection)) OR TITLE(mobile OR wearable OR mhealth OR sensors OR "tele-monitoring" OR telehealth OR smartphone OR coronary OR "heart failure" OR "heart disease" OR cardiovascular OR behavio*r OR persuasive OR persuasion OR informatics OR tracking OR quantified OR prevention OR rehabilitation OR monitoring OR habit OR detection ) AND ( PUBYEAR &gt; 2007 ) AND ( LIMIT-TO ( LANGUAGE,"English " ) )</p> | 2862 |
| PsycINFO | <p>(AB(mobile OR wearable OR mhealth OR sensing OR "tele-monitoring" OR telehealth OR smartphone) AND AB(cardiac OR coronary OR cardiovascular OR "heart failure" OR "heart disease") AND AB(behavio*r OR "health*care" OR prevention OR detection OR rehabilitation OR persuasion OR persuasive OR informatics OR tracking OR monitoring OR quantified OR habit)) OR (TI(mobile OR wearable OR mhealth OR sensors OR "tele-monitoring" OR telehealth OR smartphone) AND TI(coronary OR "heart failure" OR "heart disease" OR cardiovascular) AND</p>                                                                                                                                                                                                                                                                                                                                                                                                                                                                                                                                           | 102  |

|        |                                                                                                                                                                                                                                                                                                                                                                                                                                                                                                                                                                                                                                                                                                                                                                                                 |      |
|--------|-------------------------------------------------------------------------------------------------------------------------------------------------------------------------------------------------------------------------------------------------------------------------------------------------------------------------------------------------------------------------------------------------------------------------------------------------------------------------------------------------------------------------------------------------------------------------------------------------------------------------------------------------------------------------------------------------------------------------------------------------------------------------------------------------|------|
|        | TI(behavio*r OR persuasive OR persuasion OR informatics OR tracking OR quantified OR prevention OR rehabilitation OR monitoring OR habit OR detection)) OR (IF(mobile OR wearable OR mhealth OR sensors OR "tele-monitoring" OR telehealth OR smartphone) AND IF(coronary OR "heart failure" OR "heart disease" OR cardiovascular) AND IF(behavio*r OR persuasive OR persuasion OR informatics OR tracking OR quantified OR prevention OR rehabilitation OR monitoring OR habit OR detection))                                                                                                                                                                                                                                                                                                  |      |
| PubMed | ((mobile[Title/Abstract] OR wearable[Title/Abstract] OR mhealth[Title/Abstract] OR sensing[Title/Abstract] OR "tele-monitoring"[Title/Abstract] OR telehealth[Title/Abstract] OR smartphone[Title/Abstract]) AND (cardiac[Title/Abstract] OR coronary[Title/Abstract] OR cardiovascular[Title/Abstract] OR "heart failure"[Title/Abstract] OR "heart disease"[Title/Abstract])) AND (behavio*r[Title/Abstract] OR "health*care"[Title/Abstract] OR prevention[Title/Abstract] OR detection[Title/Abstract] OR rehabilitation[Title/Abstract] OR persuasion[Title/Abstract] OR persuasive[Title/Abstract] OR informatics[Title/Abstract] OR tracking[Title/Abstract] OR monitoring[Title/Abstract] OR quantified[Title/Abstract] OR habit[Title/Abstract]) Filters: in the last 10 years, Humans | 1230 |
