# Supplementary material for: Barriers to and Facilitators of Technology in Cardiac Rehabilitation and Self-Management: Systematic Qualitative Grounded Theory Review
Source: PubMed Central journal article supplement (PMC7688378; doi:10.2196/18025), 2020-11-11
Supplement: jmir_v22i11e18025_app3.pdf [file jmir_v22i11e18025_app3.pdf]

## Multimedia Appendix 2: Critical Appraisal Skills Programme Qualitative Checklist<sup>1</sup>

### Quality Assessment for Qualitative Studies Table

1. Was there a clear statement of the aims of the research?
2. Is a qualitative methodology appropriate?
3. Was the research design appropriate to address the aims of the research?
4. Was the recruitment strategy appropriate to the aims of the research?
5. Was the data collected in a way that addressed the research issue?
6. Has the relationship between researcher and participants been adequately considered?
7. Have ethical issues been taken into consideration?
8. Was the data analysis sufficiently rigorous?
9. Is there a clear statement of findings?

| <b>Name (year)</b>                 | <b>1</b> | <b>2</b> | <b>3</b>   | <b>4</b> | <b>5</b> | <b>6</b>   | <b>7</b>   | <b>8</b>   | <b>9</b> | <b>Rating</b> |
|------------------------------------|----------|----------|------------|----------|----------|------------|------------|------------|----------|---------------|
| Dithmer M. et al. (2016)           | Yes      | Yes      | Can't tell | Yes      | Yes      | Can't tell | Yes        | Can't tell | Yes      | Moderate      |
| Yehle KS. et al. (2012)            | Yes      | Yes      | Yes        | Yes      | Yes      | Can't tell | Yes        | Yes        | Yes      | Strong        |
| Villalba E, et al. (2009)          | Yes      | Yes      | Yes        | Yes      | Yes      | Yes        | Can't tell | Can't tell | Yes      | Moderate      |
| Jarvis-selinger S. et al. (2011)   | Yes      | Yes      | Yes        | Yes      | Yes      | No         | Yes        | Yes        | Yes      | Strong        |
| Fischer S. et al. (2011)           | Yes      | Yes      | Yes        | Yes      | Yes      | Can't tell | Yes        | Can't tell | Yes      | Moderate      |
| Pfaeffli L. et al. (2012)          | Yes      | Yes      | Yes        | Yes      | Yes      | Can't tell | Yes        | Yes        | Yes      | Strong        |
| Katalinic O, et al. (2013)         | Yes      | Yes      | Can't tell | Yes      | Yes      | Yes        | Can't tell | Yes        | Yes      | Moderate      |
| Antypas K. and Wangberg SC. (2014) | Yes      | Yes      | Yes        | Yes      | Yes      | Yes        | Can't tell | Yes        | Yes      | Strong        |
| Geurts E. et al. (2016)            | Yes      | Yes      | Yes        | Yes      | Yes      | Can't tell | Yes        | Yes        | Yes      | Strong        |
| Buyts R. et al. (2016)             | Yes      | Yes      | Yes        | Yes      | Yes      | Can't tell | Yes        | Yes        | Yes      | Strong        |
| Cornet VP. et al. (2017)           | Yes      | Yes      | Yes        | Yes      | Yes      | Can't tell | Yes        | Yes        | Yes      | Strong        |
| Banner D. et al. (2015)            | Yes      | Yes      | Yes        | Yes      | Yes      | No         | Yes        | Can't tell | Yes      | Moderate      |
| Baek H. et al. (2018)              | Yes      | Yes      | Yes        | Yes      | Yes      | Yes        | Yes        | Yes        | Yes      | Strong        |
| Salvi D. et al. (2018)             | Yes      | Yes      | Yes        | Yes      | Yes      | Can't tell | Yes        | Can't tell | Yes      | Moderate      |
| Beatty AL. et al. (2018)           | Yes      | Yes      | Yes        | Yes      | Yes      | Can't tell | Yes        | Yes        | Yes      | Strong        |
| Smith R. et al. (2015)             | Yes      | Yes      | Yes        | Yes      | Yes      | Can't tell | Yes        | Yes        | Yes      | Strong        |

1. Critical Appraisal Skills Programme. URL: <https://casp-uk.net/> [accessed 2019-02-28]
